# Supplementary material
Source: Springer Nature journal article supplement (https://www.springermedizin.de/resource/supplementary/13014_2014_1177_MOESM2_ESM.pdf/9635072)

Local-regional  
recurrence  
(LRR)

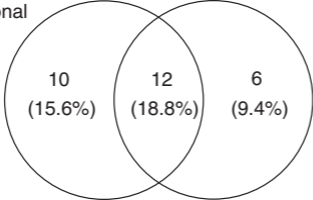

Distant metastasis  
(DM)

Supplement: MOESM2 [file 9635072]
